# Supplementary material
Source: PubMed Central journal article supplement (PMC4945698)

**Figure S1:** Trends in death rates from cardiovascular diseases for adults aged 30 years and older. Within each age group, death rates are age-standardized to the WHO standard population. Trends are smoothed using a 5-year moving average. See Figure 3 for separate results for people aged 30-69 years and 70 years and older.

### Men

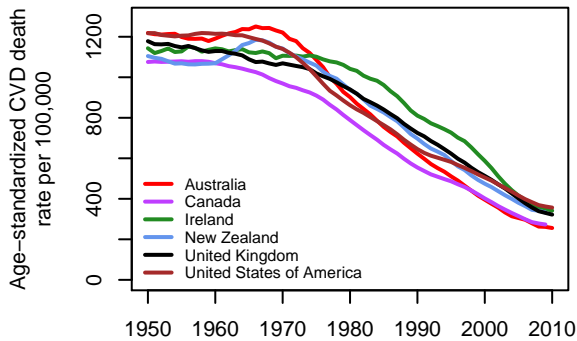

### Women

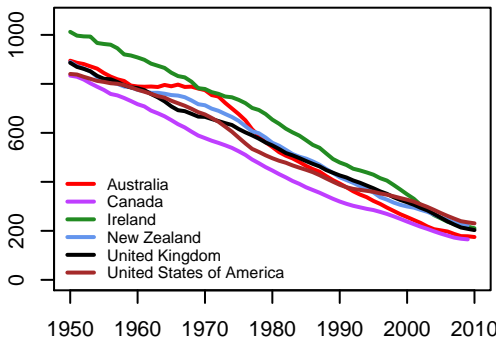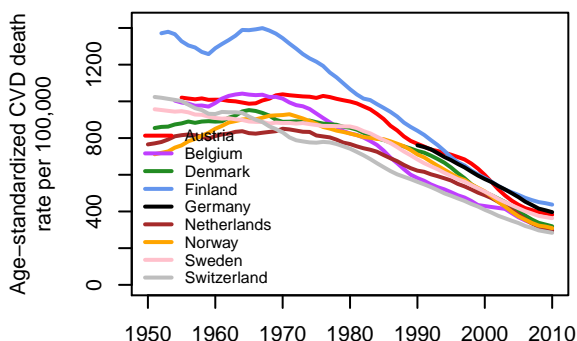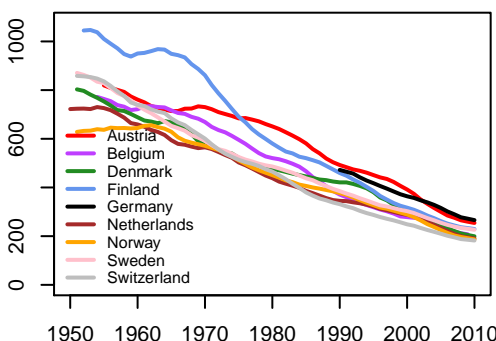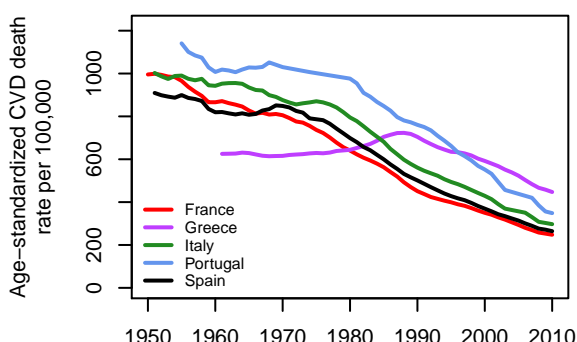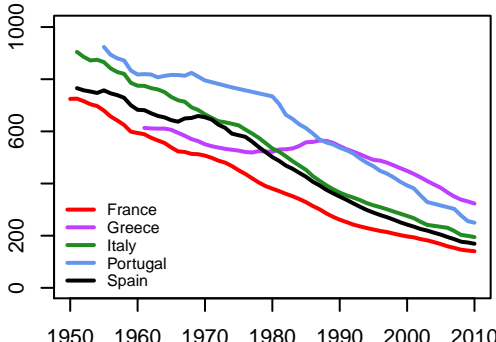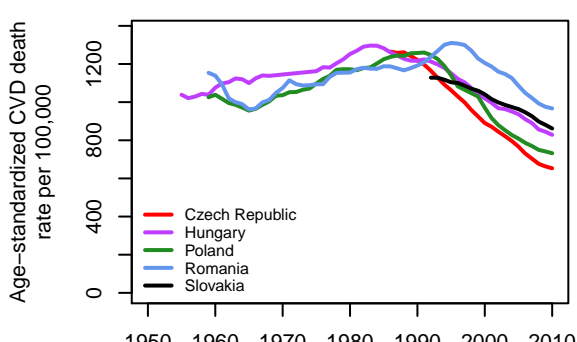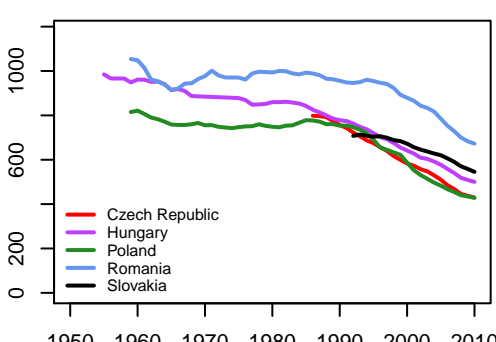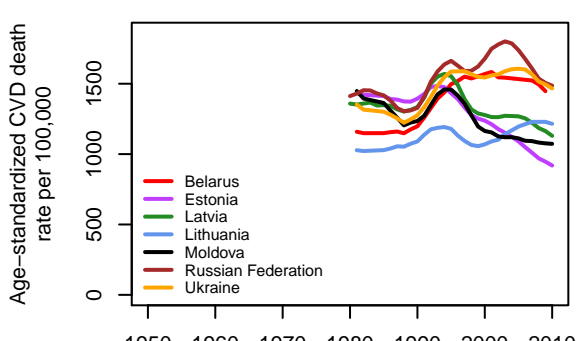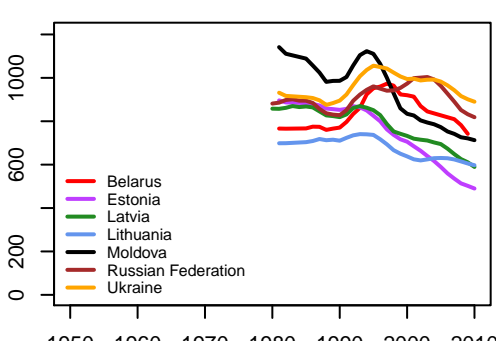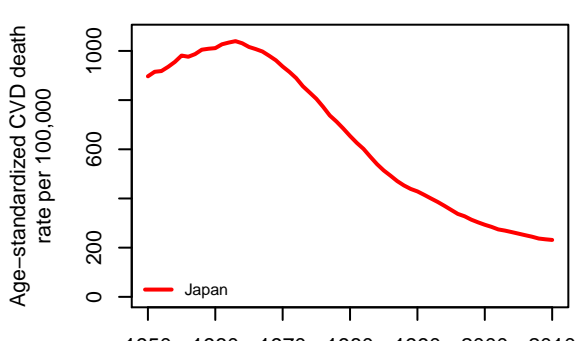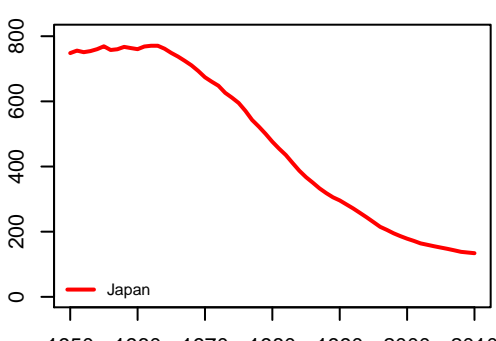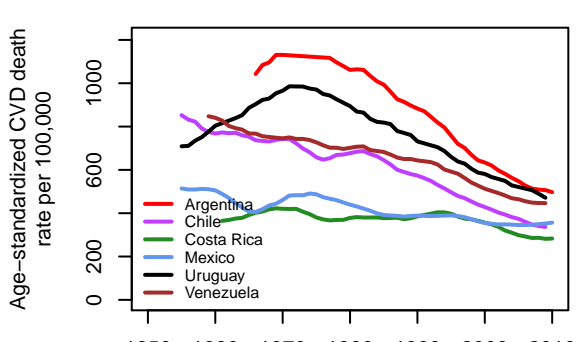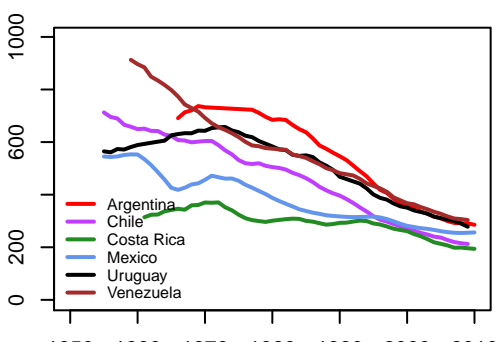

Supplement: NIHMS800899-supplement-Supplement.pdf [file NIHMS800899-supplement-Supplement.pdf]
